# Supplementary material for: The association between selected genetic variants and individual differences in experimental pain
Source: publisher site journal article supplement (doi:10.1515/sjpain-2020-0091), 2020-10-28
Supplement: Supplementary file 1 [file j_sjpain-2020-0091_suppl_001.docx]

| **SUPPLEMENTARY TABLE 1** Details of the testing parameters in the experimental pain testing procedure. | | | | | | | | | | | | |
| --- | --- | --- | --- | --- | --- | --- | --- | --- | --- | --- | --- | --- |
| **Test** | **Modality** | **Instrument** | **Instrument size** | **Instrument manufacturer** | **Temporality** | **Duration** | **Baseline** | **Increase rate** | **Decrease rate** | **Pain**  **level** | **Side** | **Position** |
| Pain6 test | Contact heat | Peltier thermode | 30×30 mm | Pathway model ATS, Medoc, Ramat Yishai, Israel | Constant | 30 s | 32° | 1°C/s | 8°C/s | Pain6 | Left | Thenar eminence |
| Pressure pain threshold | Pressure | Handheld algometer | 1 cm2 | AlgoMed, Medoc, Ramat Yishai, Israel | Increasing | 1 rep | 0 N | 5 N/s | - | First sensation of pain | Left and right | 1/3 distal part of the trapezius muscle |
| Heat pain threshold | Contact heat | Peltier thermode | 30×30 mm | Pathway model ATS, Medoc, Ramat Yishai, Israel | Increasing | 3 rep | 32° | 2°C/s | 8°C/s | First sensation of pain | Right | Distal volar aspect of the forearm |
| Heat pain tolerance | Contact heat | Peltier thermode | 30×30 mm | Pathway model ATS, Medoc, Ramat Yishai, Israel | Increasing | 1 rep | 32° | 2°C/s | 8°C/s | Last tolerable | Right | Distal volar aspect of the forearm |
| Test stimulus CPM | Contact heat | Peltier thermode | 30×30 mm | Pathway model ATS, Medoc, Ramat Yishai, Israel | Constant | 120 s | 32° | 1°C/s | 8°C/s | Pain6 | Right (25 healthy left) | Proximal volar aspect of the forearm |
| Conditioning stimulus CPM | Cold | Circulating water bath | 7.5 L | LAUDA Alpha RA8, LAUDA-Brinkman LP., New Jersey, USA | Constant | 120 s | 7°C | - | - | Pain6 | Left (25 healthy right) | Hand |
| Offset analgesia | Contact heat | Peltier thermode | 30×30 mm | Pathway model ATS, Medoc, Ramat Yishai, Israel | Constant | 30 s | 32°C | 1°C/s | 8°C/s | Pain6 | Left | Proximal and distal volar aspect of the forearm |
| Temporal summation | Contact heat | Peltier thermode | 30×30 mm | Pathway model ATS, Medoc, Ramat Yishai, Israel | Constant | 120 s | 32°C | 1°C/s | 8°C/s | Pain6 | Right (25 healthy left) | Proximal volar aspect of the forearm |
| Primary hyperalgesia | Contact heat | Peltier thermode | 30×30 mm | Pathway model ATS, Medoc, Ramat Yishai, Israel | Constant | 300 s | 32°C | 1°C/s | 8°C/s | Pain6 | Left | Middle volar aspect of the forearm |
| Secondary hyperalgesia | Mechanical | von Frey filament | 5.88 | Touch-Test TM Sensory Evaluator, Stoelting, Illinois, USA | Repetitive | 1.5 s | - | - | - | - | Left | In 8 directions 5 cm from the heat stimulation area |
| Abbreviations: CPM; conditioned pain modulation | | | | | | | | | | | | |
