# Supplementary material for: The association between selected genetic variants and individual differences in experimental pain
Source: publisher site journal article supplement (doi:10.1515/sjpain-2020-0091), 2020-10-28
Supplement: Supplementary file 2 [file j_sjpain-2020-0091_suppl_002.docx]

| **SUPPLEMENTARY TABLE 2** Details of the genotyping methods for the different SNPs. | | | |  |
| --- | --- | --- | --- | --- |
| SNP | **rs25531** | **rs4680** | **rs1799971** | |
| Gene | SLC6A4 | COMT | OPRM1 | |
| Chr:position | 17:30237328 | 22:19963748 | 6:154039662 | |
| Allele | A>G | A>G | A>G | |
| Genomic DNA | 5 ng | 5 ng | 5 ng | |
| Master Mix | 25 mL | 2.5 mL | 2.5 mL | |
| Type of genotyping assay | Custom made assay  (forward primer sequence 5’-GGCGTTGCCGCTCTGAATGC-3’,  reverse primer sequence 5’-GAGGGACTGAGCTGGACAACCAC-3’) | Predesigned drug metabolism assay | Predesigned assay | |
| Context Sequence [VIC/FAM] | **(CC)**CCCTGCACCCCC**[A/G]**GCAa | CCAGCGGATGGTGGATTTCGCTGGC**[A/G]**TGAAGGACAAGGTGTGCATGCCTGA | GGTCAACTTGTCCCACTTAGATGGC**[A/G]**ACCTGTCCGACCCATGCGGTCCGAA | |
| Genotyping assay | 2 mL | 0.25 mL | 0.25 mL | |
| PCR initialization | 2 min at 95˚C | 10 min at 95˚C | 10 min at 95˚C | |
| PCR cycles | 30 | 50 | 40 | |
| PCR denaturation | 30 sec at 95˚C | 15 sec at 95˚C | 15 sec at 95˚C | |
| PCR annealing | 20 sec 65˚C | 90 sec 60˚C | 60 sec 60˚C | |
| PCR elongation | 60 sec 72˚C | - | - | |
| PCR final elongation | 5 min 72˚C | - | - | |
| Abbreviations: SNP; single nucleotide polymorphism, Chr; chromosome; PCR; Polymerase chain reaction  a = CCCCC for VIC and CC for FAM. | | | |  |
