# Supplementary material for: The association between selected genetic variants and individual differences in experimental pain
Source: publisher site journal article supplement (doi:10.1515/sjpain-2020-0091), 2020-10-28
Supplement: Supplementary file 3 [file j_sjpain-2020-0091_suppl_003.docx]

| **SUPPLEMENTARY TABLE 3** Descriptives and differences in sample characteristics, experimental pain test results and genotypes between patients and healthy volunteers, and between patients with leg pain < 3 VAS and leg pain ≥ 3 VAS when pain tested. | | | | | | | | | | |
| --- | --- | --- | --- | --- | --- | --- | --- | --- | --- | --- |
|  | **Patients** | | **Healthy volunteers** | |  | **Patients with leg pain <3 VAS at 6 week follow up** | | **Patients with leg pain ≥3 VAS at 6 week follow up** | |  |
|  | **n** | **%/ mean (SD)/ median (IQR)** | **n** | **%/ mean (SD)/ median (IQR)** | **p-valuea** | **n** | **%/ mean (SD)/ median (IQR)** | **n** | **%/ mean (SD)/ median (IQR)** | **p-valuea** |
| **Sample characteristics** |  |  |  |  |  |  |  |  |  |  |
| Sex, males | 138 | 59.2 | 70 | 56.5 | 0.653 | 112 | 57.7 | 58 | 59.8 | 0.801 |
| Age, yearsb | 233 | 40 (19) | 124 | 26 (9) | **<0.001c** | 194 | 37 (19) | 97 | 41 (21) | **0.002** |
| Education >12 years | 206 | 88.4 | 115 | 92.7 | 0.205 | 182 | 93.8 | 79 | 81.4 | **0.002** |
| Left handed | 27 | 12.2 | 11 | 8.9 | 0.377 | 21 | 11.2 | 11 | 11.8 | 0.882 |
| BMI, kg/m2 | 229 | 25.8 (3.7) | 122 | 24.1(3.0) | **<0.001** | 190 | 25.5 (3.7) | 96 | 25.4 (3.3) | 0.830 |
| Systolic blood pressure, mmHg | 233 | 124.4 (13.8) | 124 | 121.1 (12.0) | 0.022 | 194 | 123.5 (13.2) | 97 | 124.2 (14.3) | 0.704 |
| Diastolic blood pressure, mmHg | 233 | 76.3 (9.7) | 124 | 71.8 (9.0) | **<0.001** | 194 | 75.2 (9.6) | 97 | 76.2 (10.0) | 0.390 |
| Current smoker | 32 | 13.9 | 12 | 9.7 | 0.311 | 23 | 12.0 | 15 | 15.6 | 0.460 |
| **Experimental pain tests** |  |  |  |  |  |  |  |  |  |  |
| Heat pain threshold, °C | 233 | 44.5 (2.9) | 124 | 43.9 (3.3) | 0.078 | 194 | 44.4 (2.8) | 97 | 44.7 (3.1) | 0.406 |
| Pressure pain threshold, Newtonb | 231 | 38.2(25.9) | 75 | 41.4 (24.9) | 0.388c | 193 | 37.9 (23.5) | 96 | 40.6 (29.3) | 0.304c |
| Heat pain tolerance threshold, °Cb | 233 | 49.3 (2.6) | 124 | 49.7 (2.3) | 0.248c | 194 | 49.5 (2.5) | 97 | 49.3 (2.7) | 0.346c |
| Conditioned pain modulation, VAS | 232 | -2.4 (1.8) | 124 | -2.6 (1.7) | 0.374 | 194 | -2.5 (1.7) | 96 | -2.5 (1.7) | 0.987 |
| Offset analgesia, VAS | 99 | -0.5 (1.8) | 47 | -0.6 (1.7) | 0.631 | 76 | -0.4 (1.8) | 51 | -0.7 (1.8) | 0.353 |
| Temporal summation, VAS | 225 | 0.4 (2.0) | 123 | 1.0 (2.1) | 0.016 | 191 | 0.7 (2.0) | 92 | 0.3 (2.1) | 0.076 |
| Secondary hyperalgesia, cm2b | 101 | 15.2 (16.8) | 48 | 13.0 (17.8) | 0.131c | 79 | 16.5 (18.5) | 51 | 13.3 (15.9) | 0.898c |
| **Genotypes** |  |  |  |  |  |  |  |  |  |  |
| 5HTTLPR/rs25531 *(SLC6A4)* |  |  |  |  | 0.301d |  |  |  |  | 0.916d |
| Low expression rate | 42 | 18 | 21 | 17.1 |  | 32 | 16.5 | 15 | 15.5 |  |
| Medium expression rate | 104 | 44.6 | 65 | 52.8 |  | 89 | 45.9 | 47 | 48.5 |  |
| High expression rate | 87 | 37.3 | 37 | 30.1 |  | 73 | 37.6 | 35 | 36.1 |  |
| Val158Met *(COMT)* |  |  |  |  | 0.063e |  |  |  |  | 0.520e |
| AA | 71 | 0.3 | 43 | 0.3 |  | 64 | 0.3 | 28 | 0.3 |  |
| AG | 122 | 0.5 | 54 | 0.4 |  | 97 | 0.5 | 48 | 0.5 |  |
| GG | 40 | 0.2 | 24 | 0.2 |  | 31 | 0.2 | 21 | 0.2 |  |
| A118G *(OPRM1)* |  |  |  |  | 0.263e |  |  |  |  | 0.369e |
| AA | 194 | 0.8 | 100 | 0.8 |  | 163 | 0.8 | 78 | 0.8 |  |
| AG | 36 | 0.2 | 23 | 0.2 |  | 30 | 0.2 | 17 | 0.2 |  |
| GG | 3 | 0.01 | 0 | 0 |  | 1 | 0.01 | 2 | 0.02 |  |
| SD; standard deviation. IQR; inter quartile range. MAF; minor allele frequency.  a = Independent sample Student t tests if not otherwise denoted. p-values <0.01 regarded as significant due to multiple testing. | | | | | | | | | | |
| b = Variables with non-normal distribution presented with median and IQR. | | | | | | | | | | |
| c = Tested with Mann-Whitney U test | | | | | | | | | | |
| d = Chi-square test  e = Fishers exact test | | | | | | | | | | |
|  | | | | | | | | | | |
